# Supplementary material for: Gluconolactone induces cellulase gene expression in cellulolytic filamentous fungus Trichoderma reesei
Source: Royal Society of Chemistry journal article supplement (doi:10.1039/c4ra06731b), 2014-01-01
Supplement: c4ra06731b1.pdf [file c4ra06731b1.pdf]

## **Gluconolactone induces cellulase gene expression in cellulolytic filamentous fungus *Trichoderma reesei***

Yanbo Kou, Jintao Xu, Yanli Cao, Xinxing Lv, Guolei Zhao, Guanjun Chen, Weixin Zhang\*,

Weifeng liu

No.27 Shanda South Road, State Key Laboratory of Microbial Technology, School of Life  
Science, Shandong University, Jinan 250100, Shandong, P. R. China

\*Correspondence should be addressed to Weixin Zhang. Tel.:+86 531 88364324; Fax: +86 531

88565610; e-mail: zhangwx@sdu.edu.cn

**Table S1 Oligonucleotide primers used in this study**

| <b>Name</b>      | <b>Sequence (5'-3')</b> |
|------------------|-------------------------|
| <i>Qactin</i> -F | TCCATCATGAAGTGCGAC      |
| <i>Qactin</i> -R | GTAGAAGGAGCAAGAGCAGTG   |
| <i>Qcbh1</i> -F  | CTTGGCAACGAGTTCTCTT     |
| <i>Qcbh1</i> -R  | TGTTGGTGGGATACTTGCT     |
| <i>Qcella</i> -F | CGTGCTCTTCACCAACAA      |
| <i>Qcella</i> -R | TCTTGCTGATCCACACCA      |
| <i>Qbgl1</i> -F  | AGTGACAGCTTCAGCGAG      |
| <i>Qbgl1</i> -R  | GGAGAGGCGTGAGTAGTTG     |
| <i>Qcrt1</i> -F  | GATTCGGCGTCTCCATTG      |
| <i>Qcrt1</i> -R  | CGAGAACCAGAGAGTGTTG     |
| <i>Qxyr1</i> -F  | CCATCAACCTTCTAGACGAC    |
| <i>Qxyr1</i> -R  | AACCCTGCAGGAGATAGAC     |
| <i>Qstp1</i> -F  | CGAGTCCGCCATTGTCATTCTG  |
| <i>Qstp1</i> -R  | GGTGAAGTCCTTGGTGCCGTAG  |

Figure S1. Extracellular exoglucanase activity in the culture supernatant of *T. reesei* cultivated by gluconolactone (0.25%, w/v) and crystalline Avicel (0.4%, w/v) respectively for the indicated time period.
